# Supplementary material for: Genetically determined telomere length as a risk factor for hematological malignancies: evidence from Mendelian randomization analysis
Source: Aging (Albany NY). 2024 Mar 6;16(5):4684–98. doi: 10.18632/aging.205625 (PMC10968690; doi:10.18632/aging.205625)
Supplement: Supplementary Figure 1 [file aging-16-205625-s001.pdf]

## SUPPLEMENTARY FIGURE

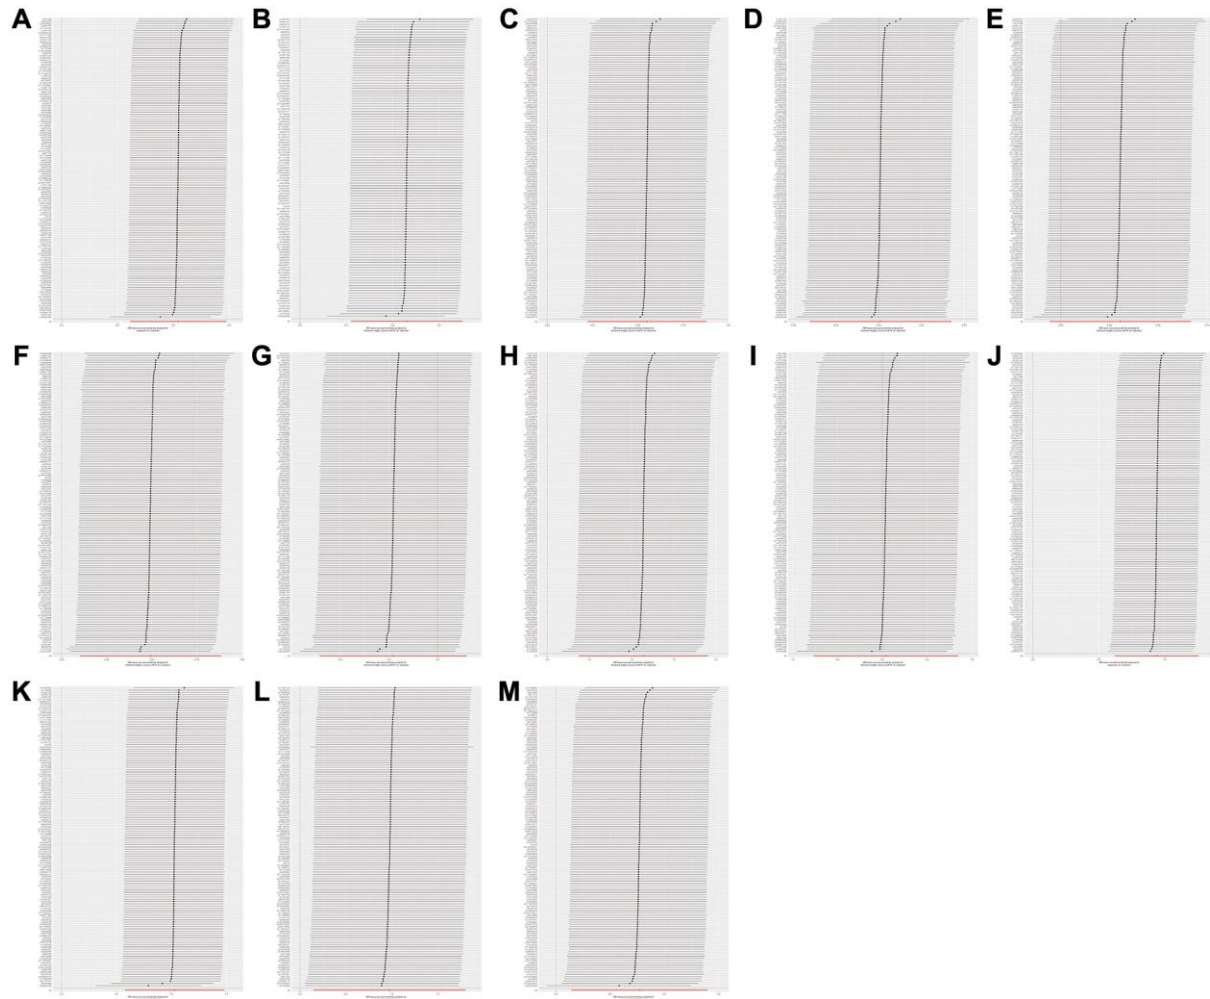

**Supplementary Figure 1. Sensitivity analysis of the leave-one-out test for the MR analysis to assess the impact of telomere length on various cancer risks. (A)** TL on primary lymphoid and hematopoietic malignant neoplasms. **(B)** TL on non-follicular lymphoma. **(C)** TL on non-Hodgkin lymphoma. **(D)** TL on follicular lymphoma. **(E)** TL on diffuse large B-cell lymphoma. **(F)** TL on Hodgkin lymphoma. **(G)** TL on mature T/NK-cell lymphomas. **(H)** TL on mantle cell lymphoma. **(I)** TL on marginal zone B-cell lymphoma. **(J)** TL on lymphoid leukaemia. **(K)** TL on chronic lymphocytic leukaemia. **(L)** TL on acute lymphocytic leukaemia. **(M)** TL on multiple myeloma.
